# Supplementary material for: LRRK2 kinase activity regulates GCase level and enzymatic activity differently depending on cell type in Parkinson’s disease
Source: PubMed Central journal article supplement (PMC9296523; doi:10.1038/s41531-022-00354-3), 2022-07-19
Supplement: 41531_2022_354_MOESM2_ESM.pdf [file 41531_2022_354_MOESM2_ESM.pdf]

# Midbrain mice lysates (Fig. 1b)

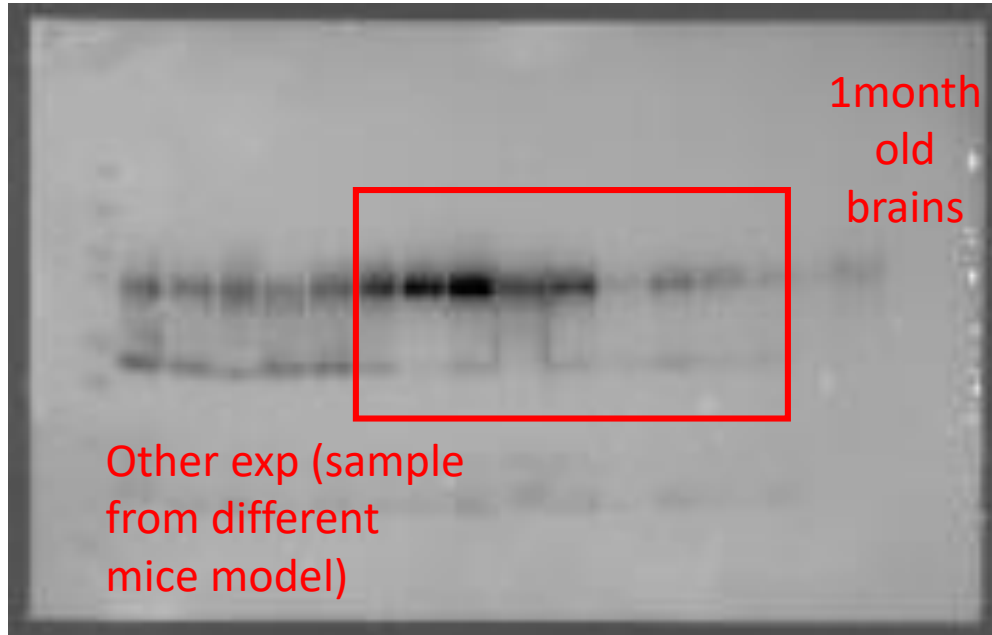

IB: GBA

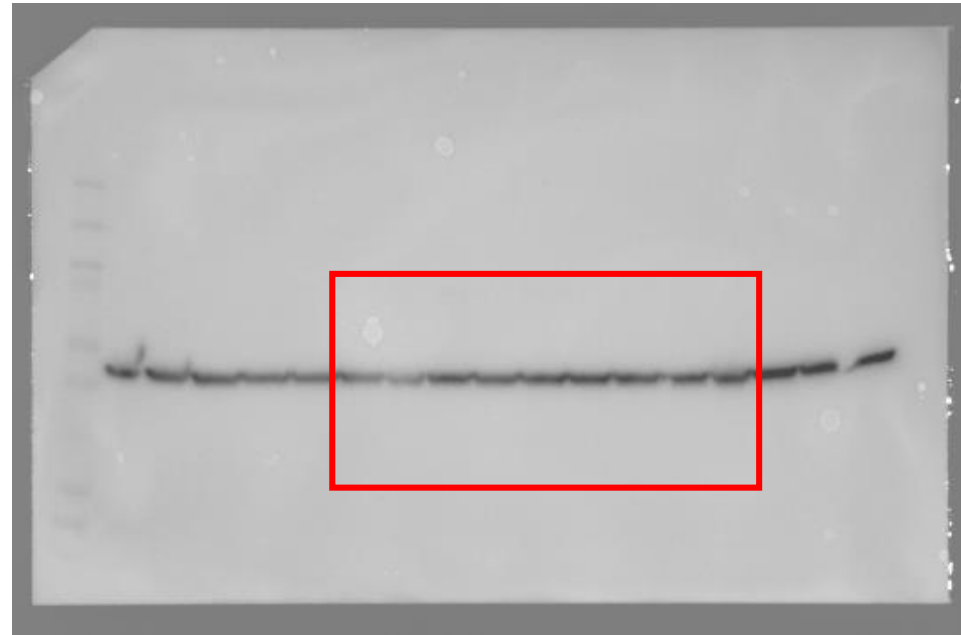

IB: actin

Human PBMCs (Fig. 2b)

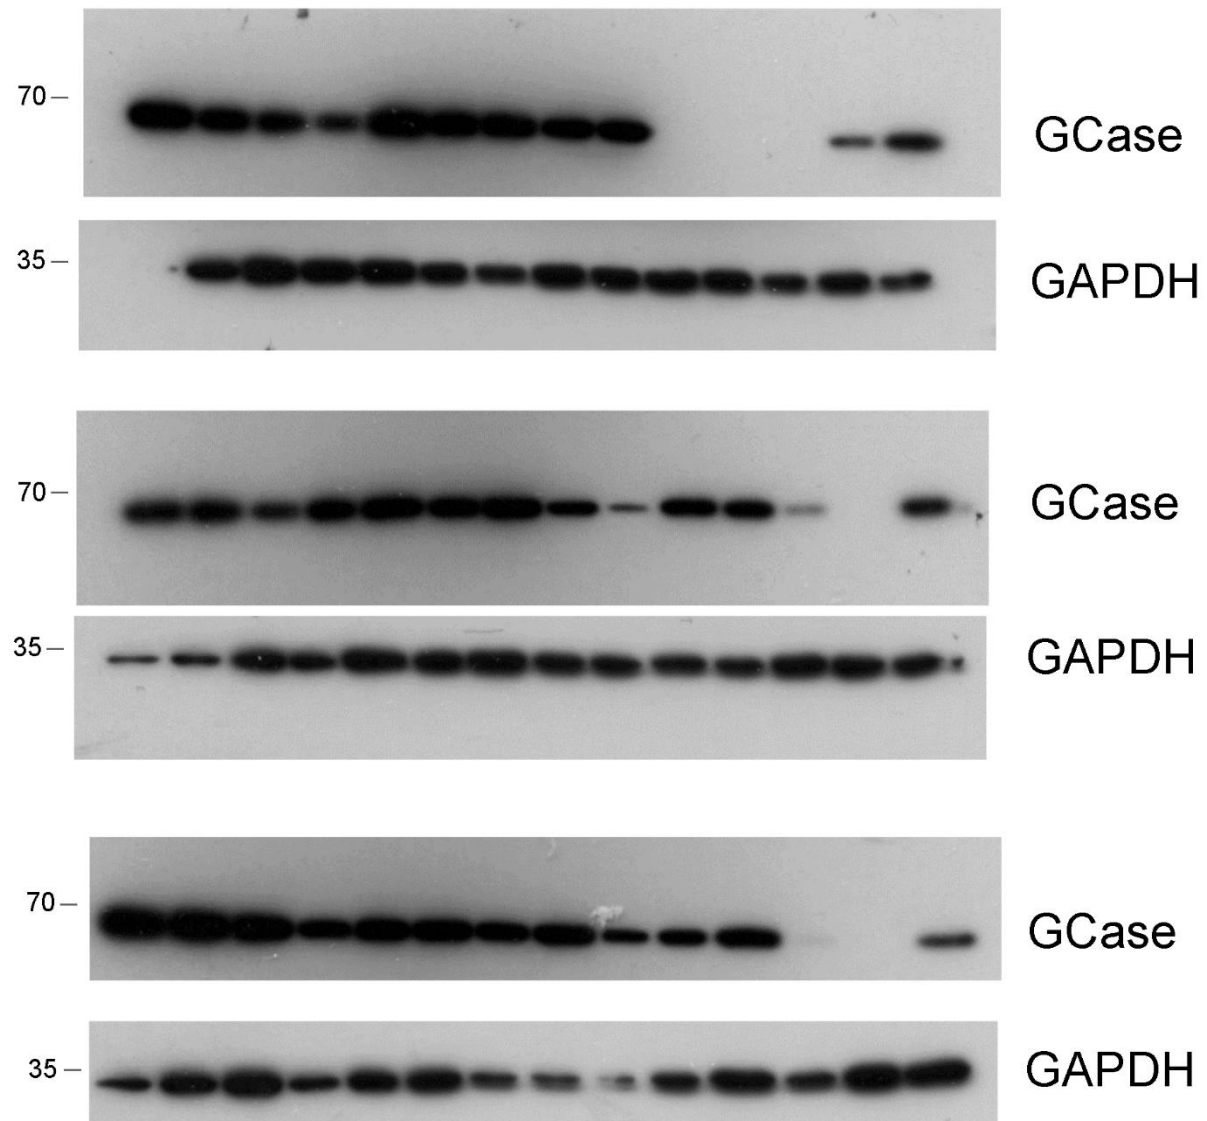

A. Human Fibroblasts (Fig. 3d)

Exposure 1

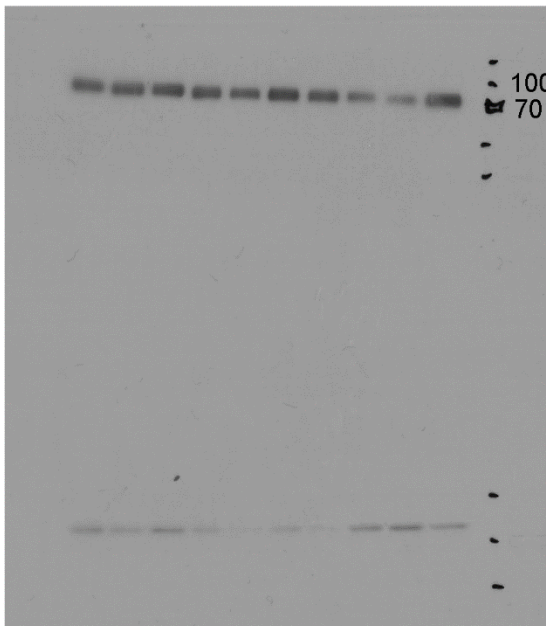

Exposure 2

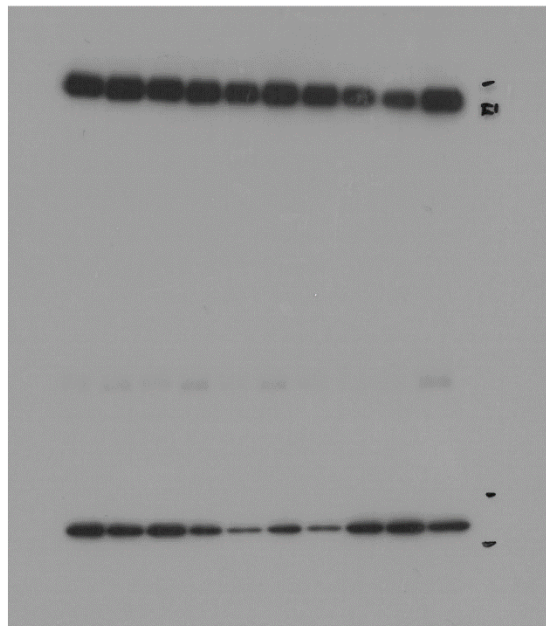

Exposure 3

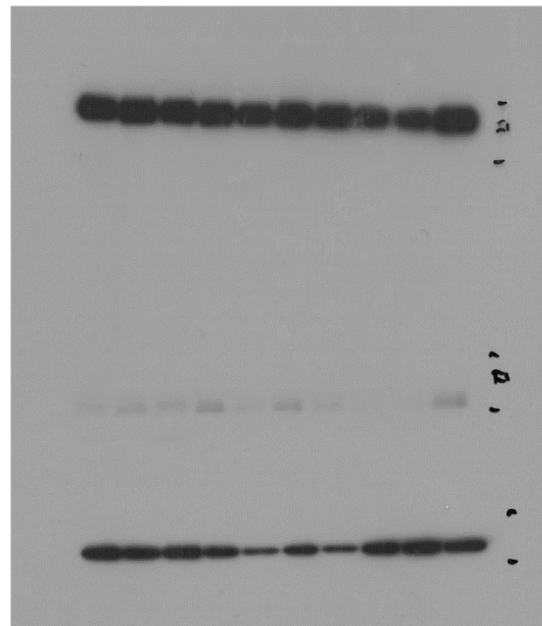

Exposure 4

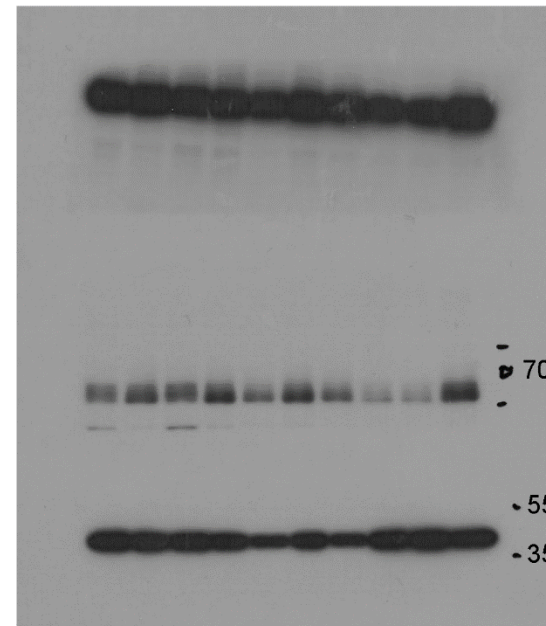

LIMP2

GCCase

GAPDH

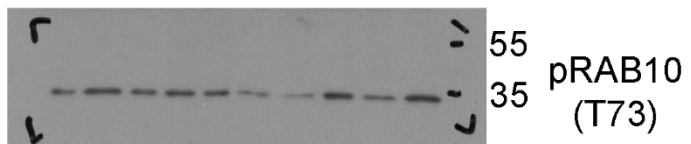

pRAB10  
(T73)

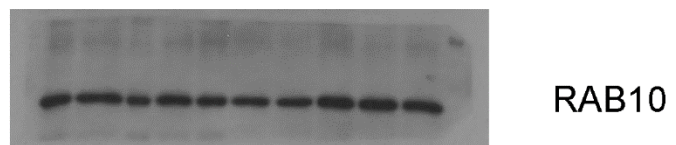

RAB10

iPSC-derived neurons lysates (Fig. 4e)

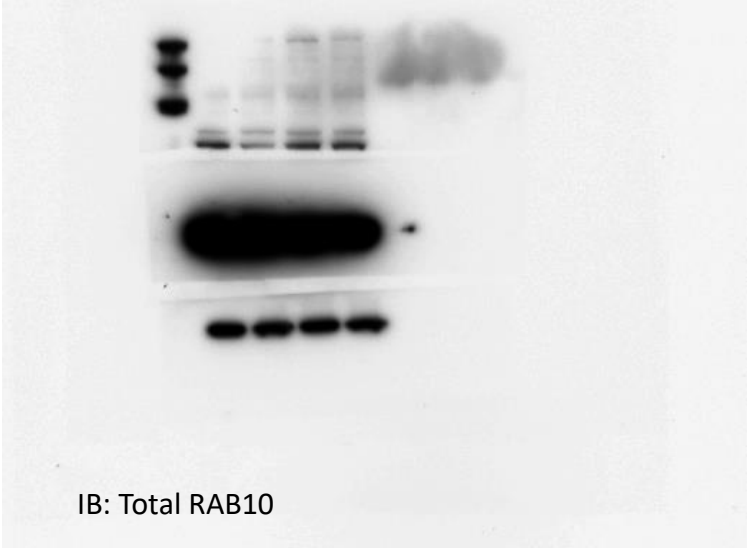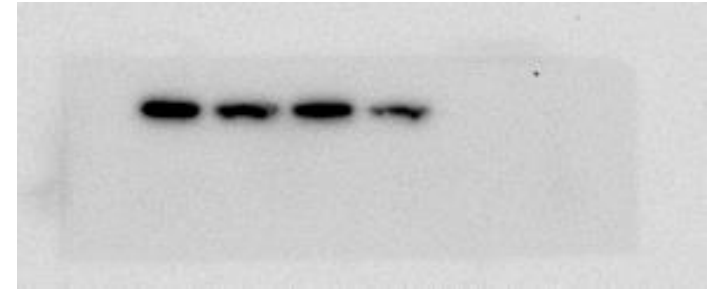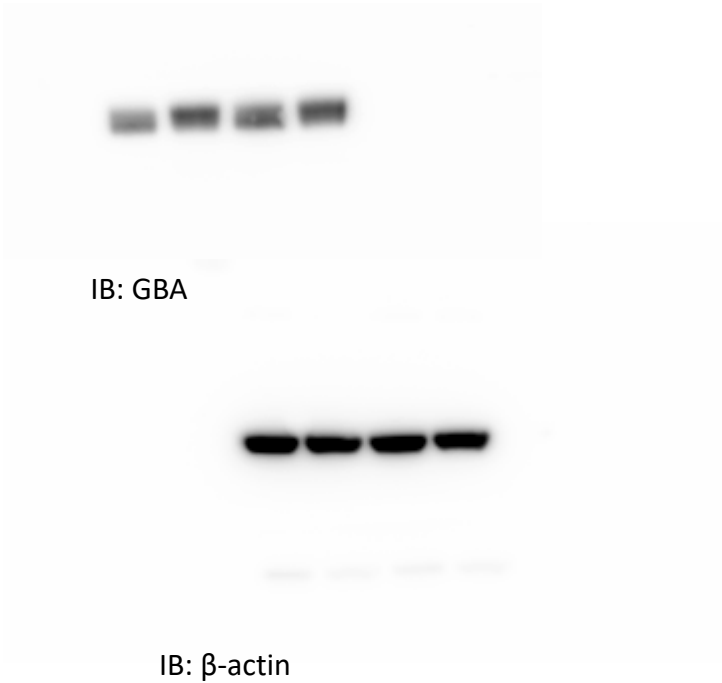

Figure 5a: HEK293T overexpressing LRRK2 and treated with MLI-2

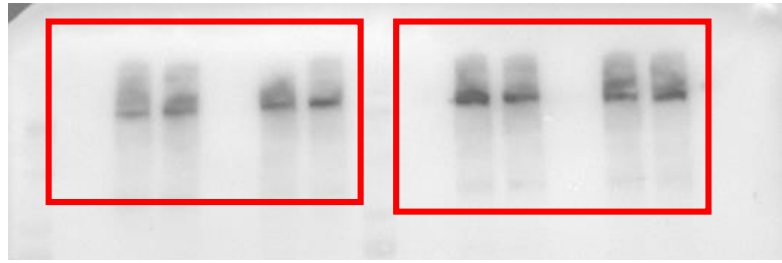

IB: flag

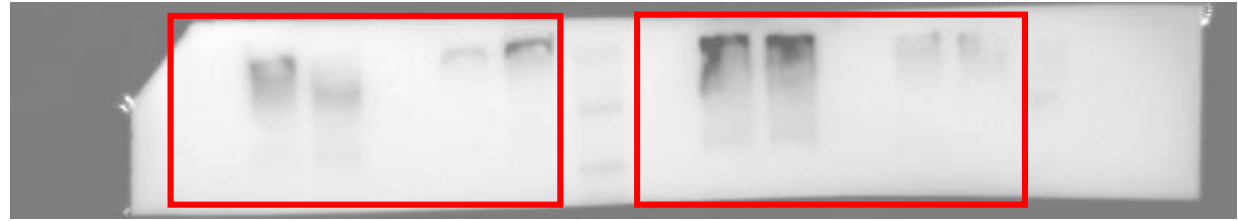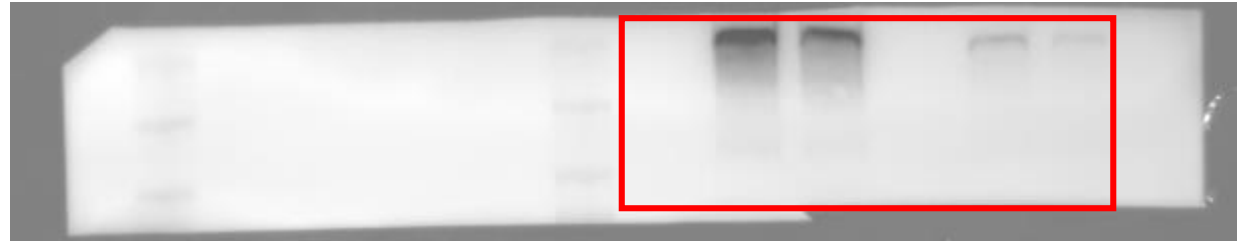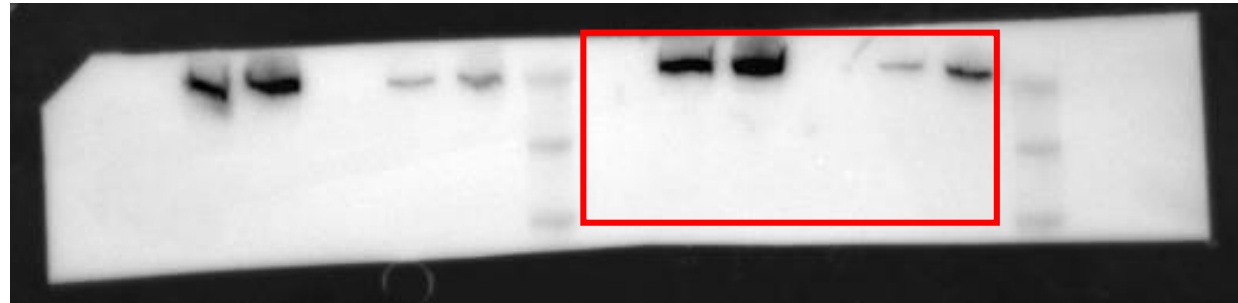

IB: pSer935 LRRK2

All blots were loaded in the same order as in the manuscript

Figure 5a: HEK293T overexpressing LRRK2 and treated with MLI-2 (GBA and actin)

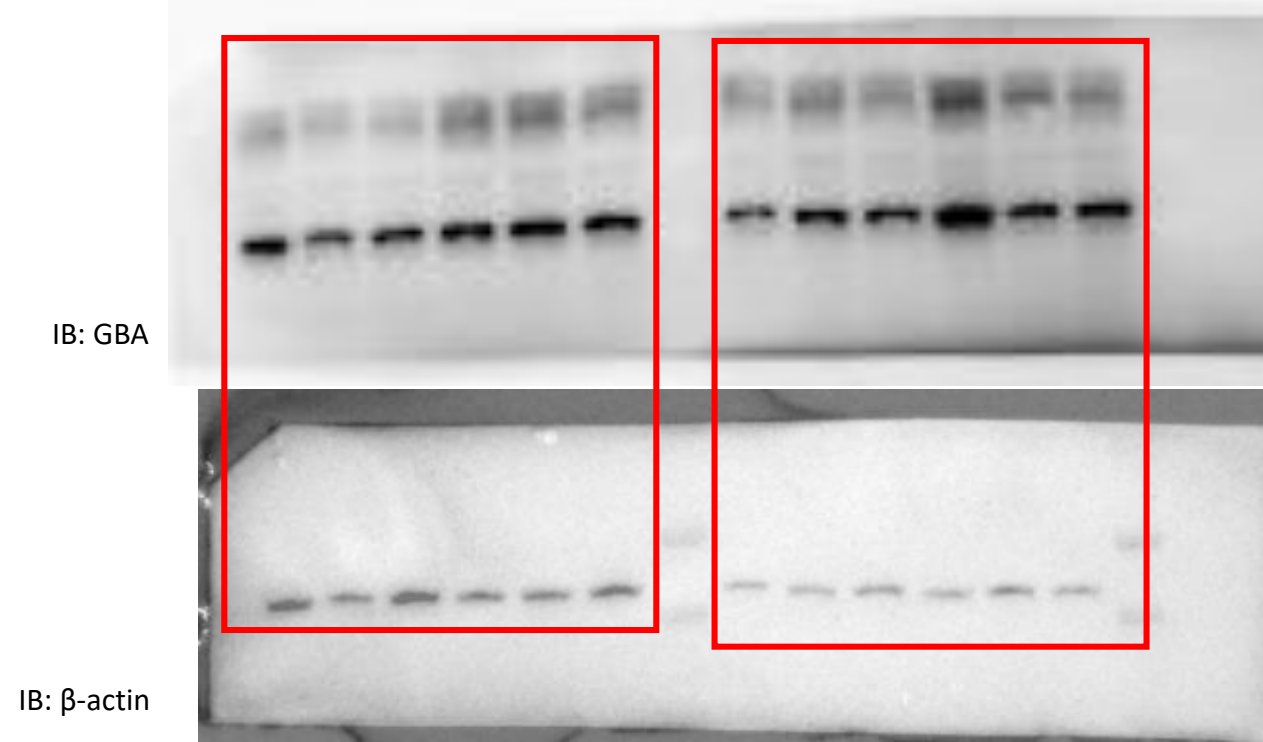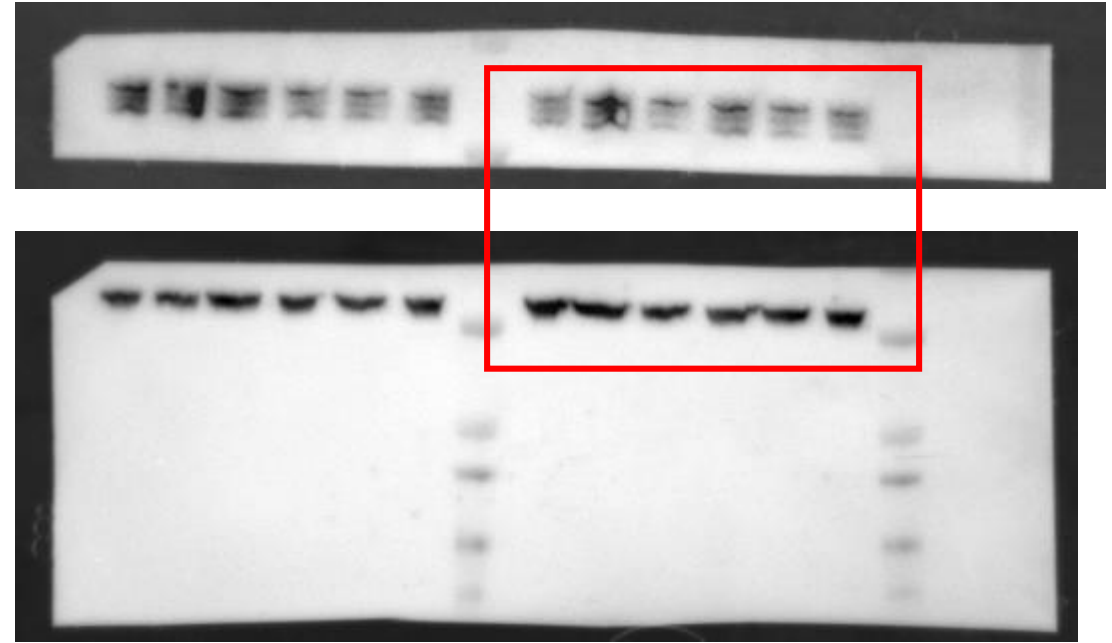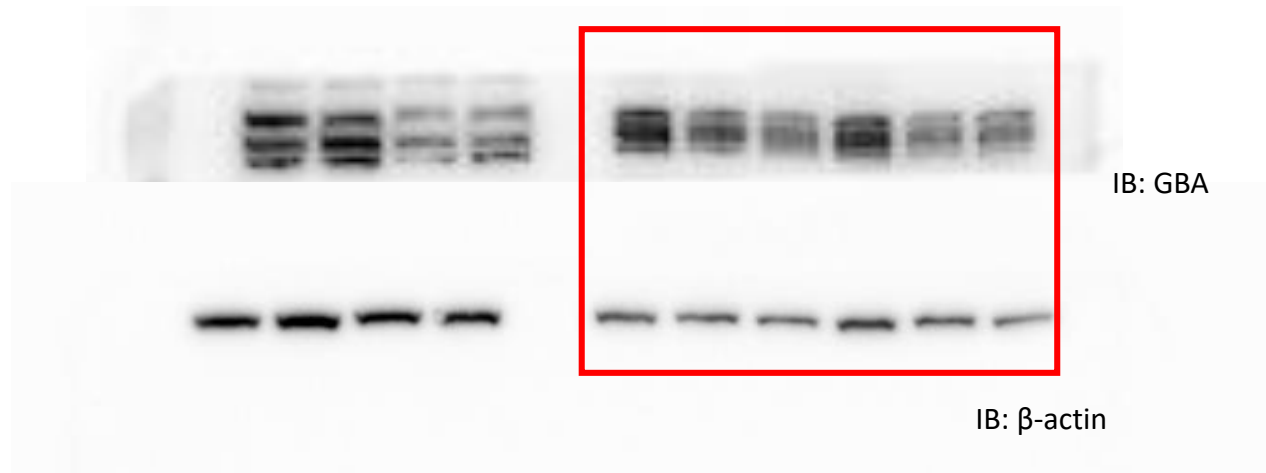

All blots were loaded in the same order as in the manuscript

### Human HEK293T (Fig. 5c; whole cell extracts)

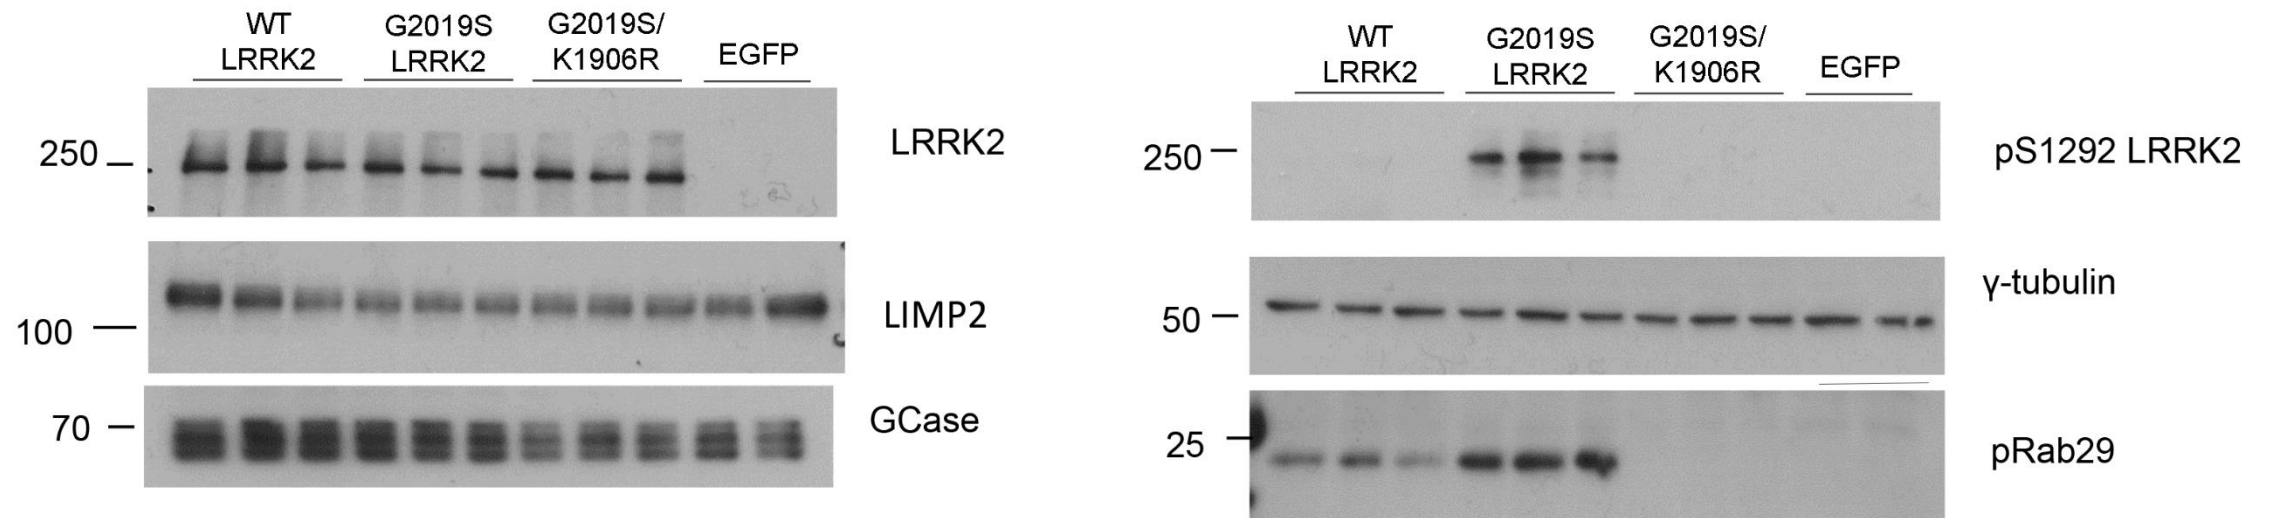

Human HEK293T cells (Fig. 5d)

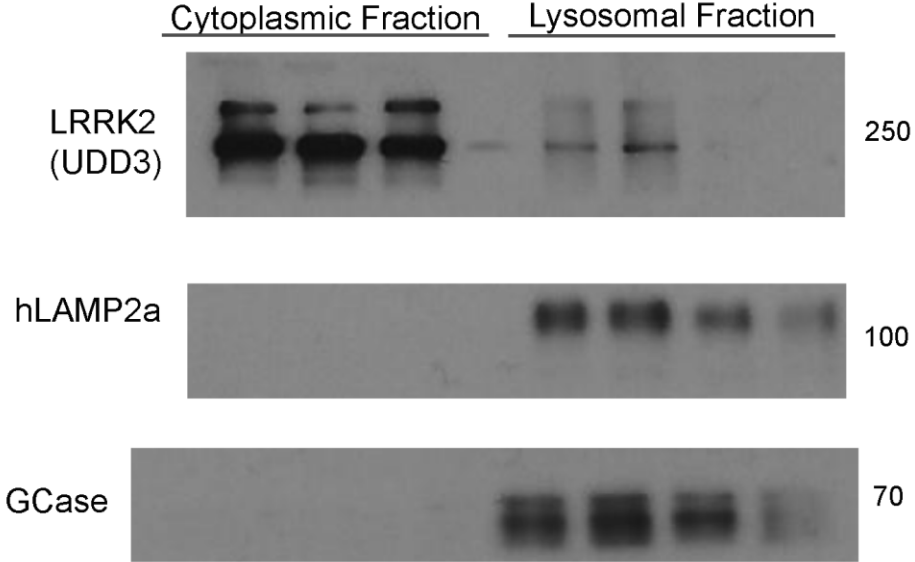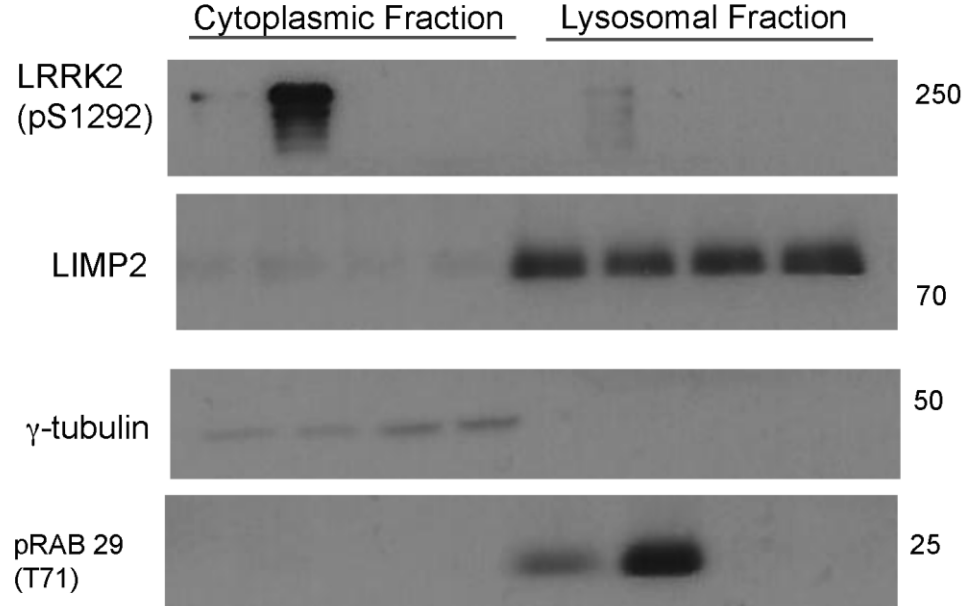



# A. RAW264.7 macrophages (Fig. 6a)

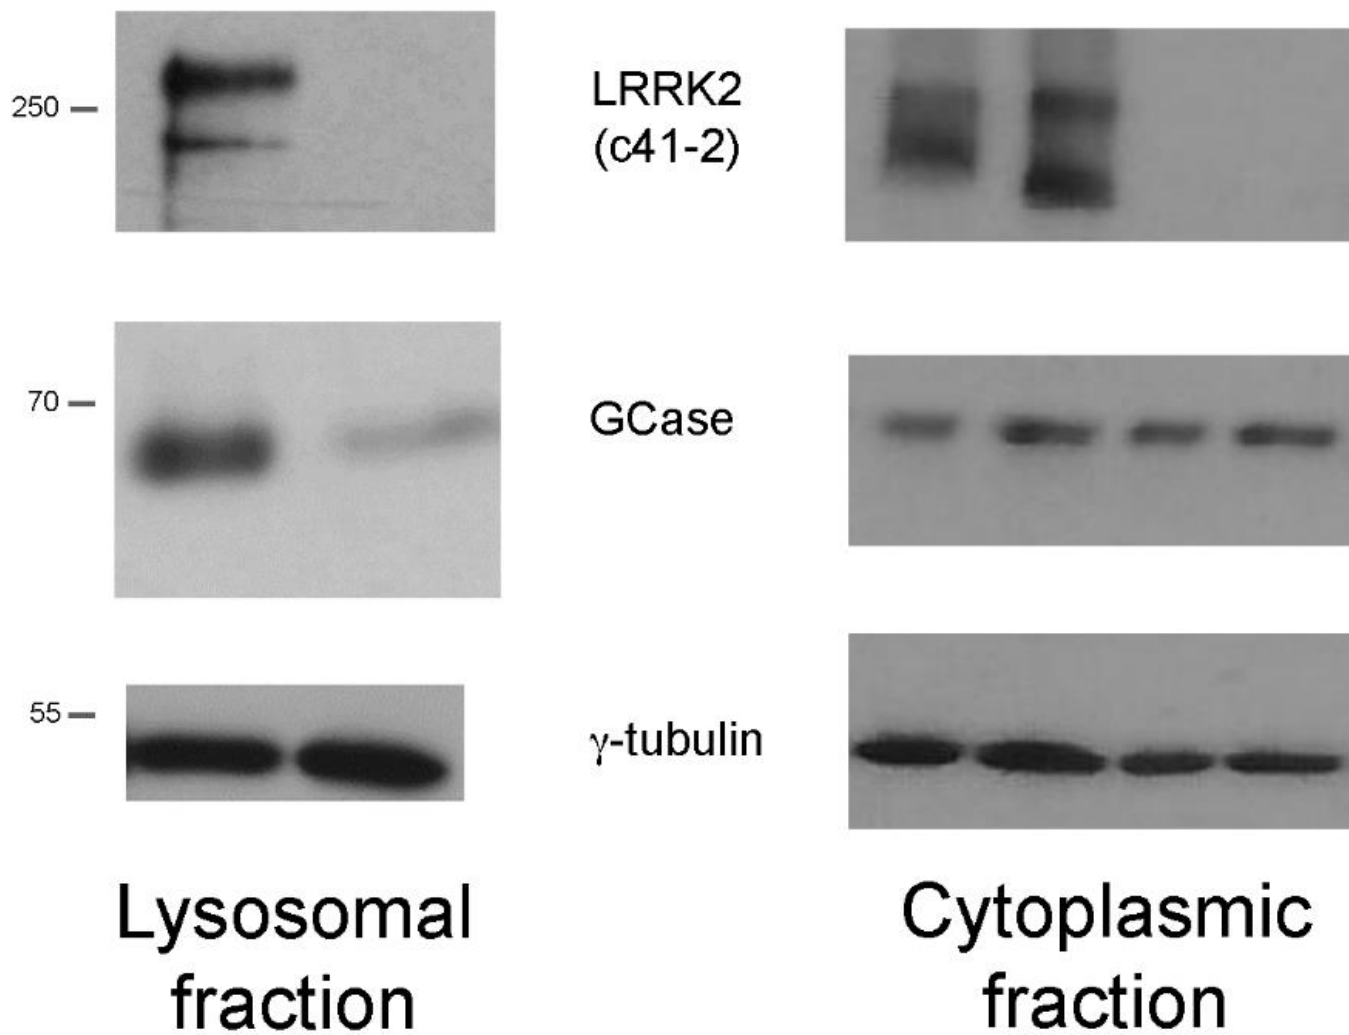

Raw WT and KO LRRK2 (Fig. 6b)

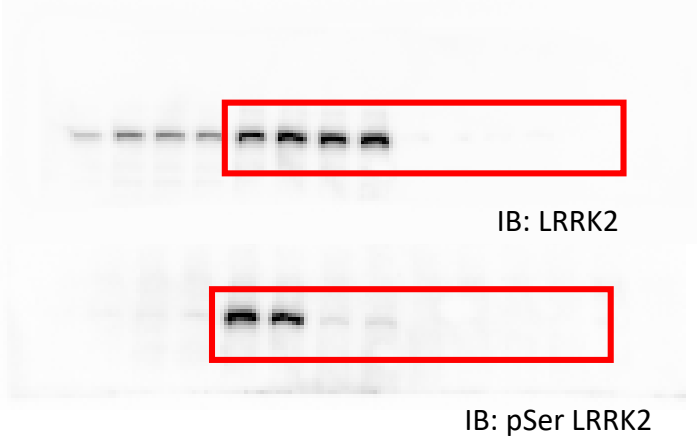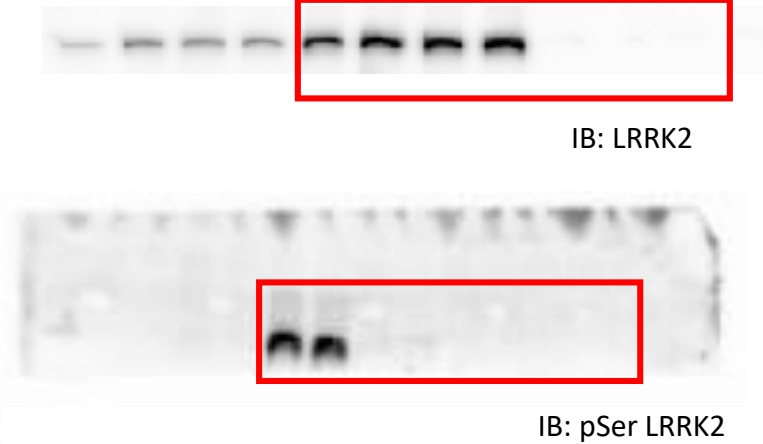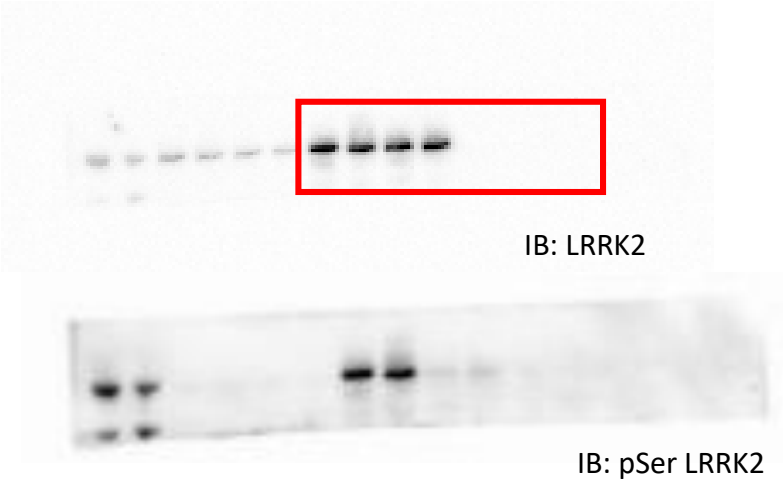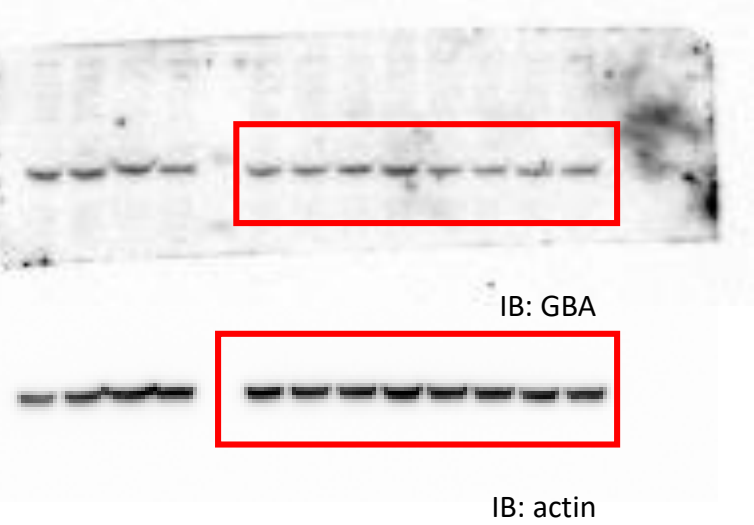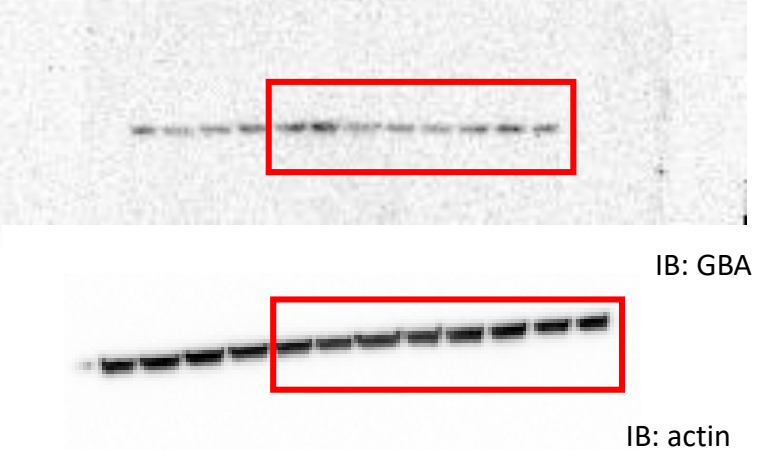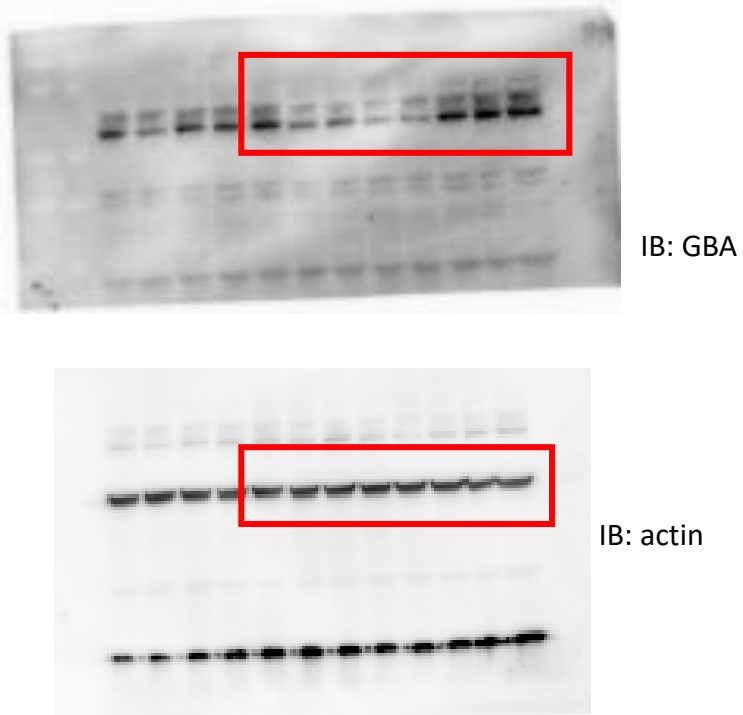

All blots were loaded in the same order as in the manuscript

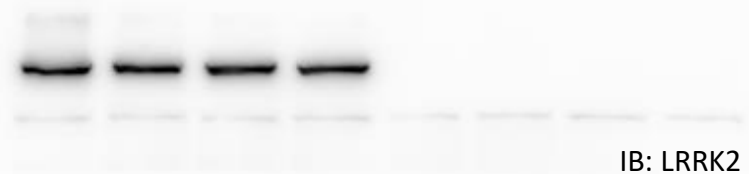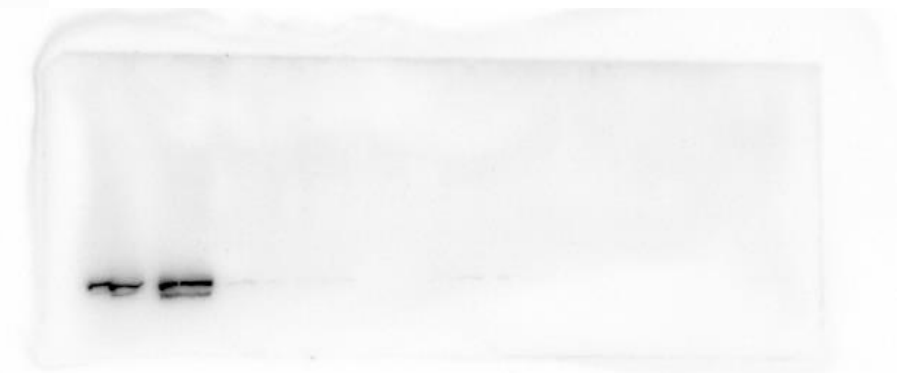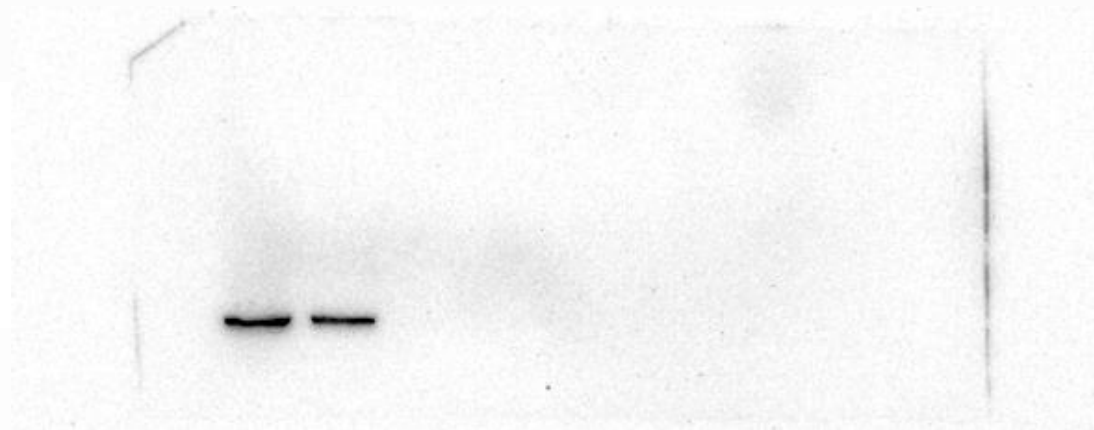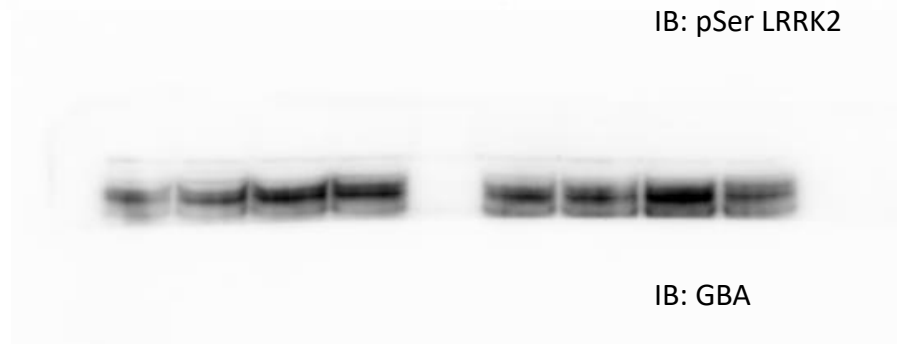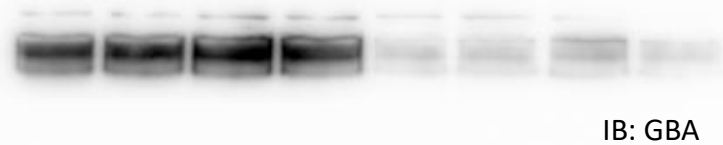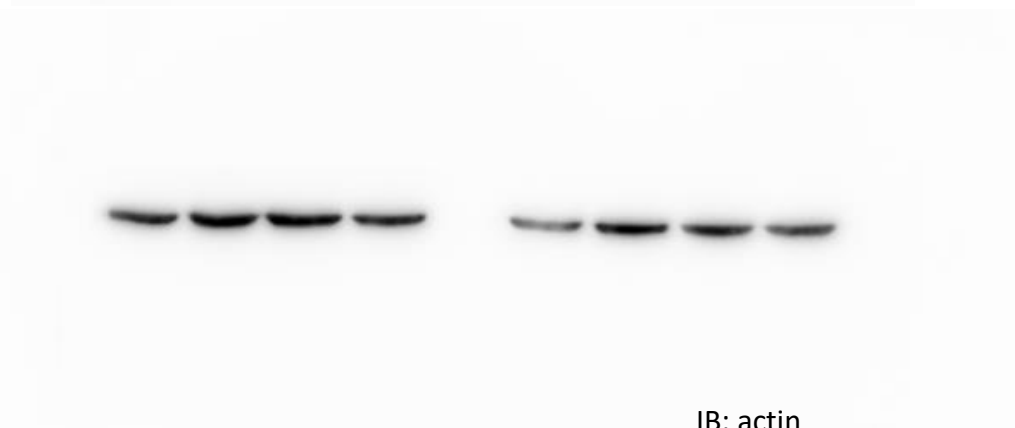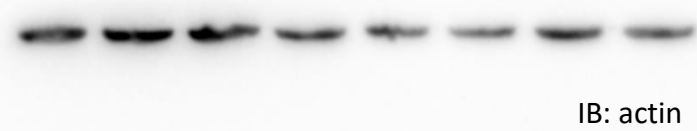

All blots were loaded in the same order
